# Supplementary material for: Conformation and Rheological Properties of Calf-Thymus DNA in Solution
Source: MDPI journal article supplement (doi:10.3390/polym8020051), 2016-02-11
Supplement: s1 [file s1]

# Supplementary Material: Conformation and Rheological Properties of Calf-Thymus DNA in Solution

Lourdes Mónica Bravo-Anaya, Marguerite Rinaudo, Félix Armando Soltero Martínez

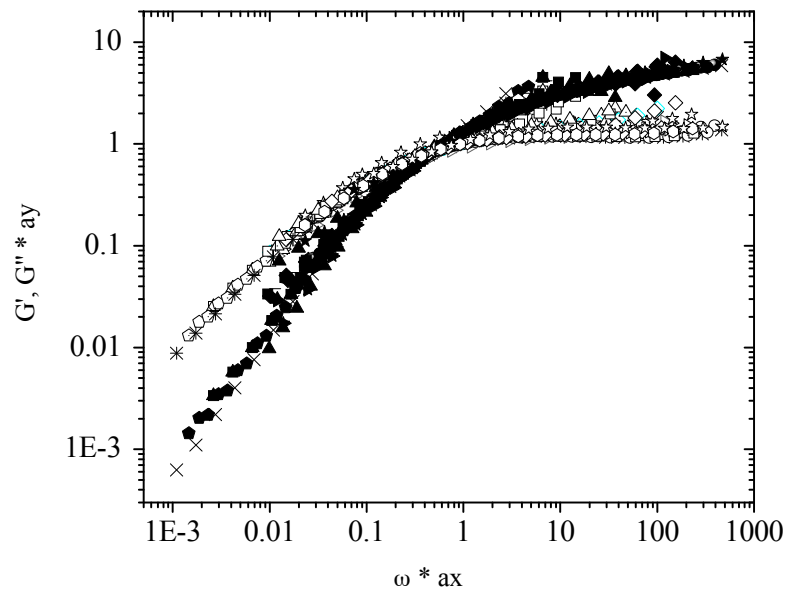

**Figure S1.** Master curve for the reduced elastic ( $G'$ ) and viscous ( $G''$ ) moduli as a function of the reduced frequency for the concentration variation of calf-thymus DNA in TE buffer at different temperatures (10, 20, 30 and 40 °C).

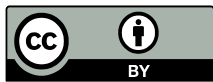

© 2016 by the authors; licensee MDPI, Basel, Switzerland. This article is an open access article distributed under the terms and conditions of the Creative Commons by Attribution (CC-BY) license (<http://creativecommons.org/licenses/by/4.0/>).
